# Supplementary material for: SGLT5 Reabsorbs Fructose in the Kidney but Its Deficiency Paradoxically Exacerbates Hepatic Steatosis Induced by Fructose
Source: PLOS journal article supplement (doi:10.1371/journal.pone.0056681), 2013-02-25
Supplement: S1 (10.1371/journal.pone.0056681.s001) [file journal.pone.0056681.s001]

**Figure S1**

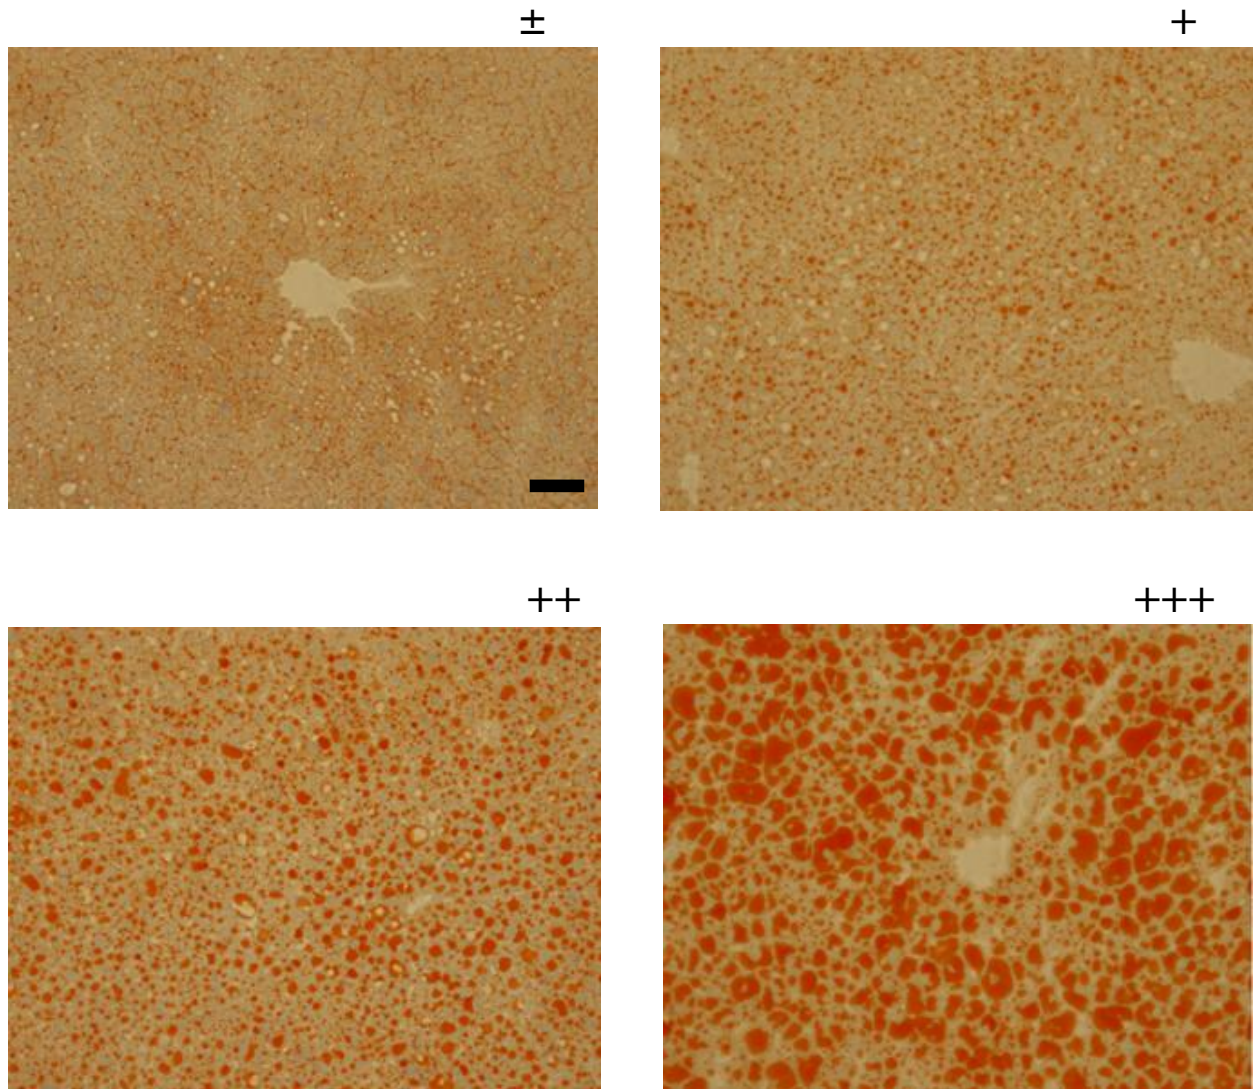

**Figure S1.** Representative figures of the liver sections from WT mice and SGLT5-deficient mice receiving plain water or fructose water.  $\pm$ ,  $+$ ,  $++$ ,  $+++$ : see grade of lipid droplets in **Table S1**. Staining: Sudan III (scale bar: 50  $\mu$ m).
